# Supplementary material for: Does compliance matter? Assessing the relationship between sovereign risk and compliance with international monetary law
Source: Springer Nature journal article supplement (doi:10.1007/s11558-010-9080-7), 2010-02-24
Supplement: 11558_2010_9080_MOESM4_ESM.pdf [file 11558_2010_9080_MOESM4_ESM.pdf]

**Online Appendix to:**  
**“Does Compliance Matter? Assessing the Relationship between  
Sovereign Risk and International Monetary Law,” forthcoming, *Review  
of International Organizations***

Stephen C. Nelson  
Assistant Professor  
Department of Political Science  
Northwestern University  
stephen-nelson@northwestern.edu

January 19, 2010

This online appendix contains supplementary tables referred to in the published version of the article. The dataset and Stata commands used to generate the results are found in the *Review of International Organization’s* electronic repository.

This document contains the results from the following supplementary analyses:

- (1) Models of the determinants of sovereign risk ratings using two alternative estimators: (a) OLS with robust standard errors adjusted for clustering by country; (b) fixed effect vector decomposition regressions with an AR(1) correction for serial correlation (see footnote 23 in the article);
  
- (2) The results of the selection-corrected models and additional robustness checks when the key explanatory variables related to compliance with Article VIII obligations are lagged by 3 years (footnote 27).

**Table 1: Determinants of Risk Ratings (OLS, Std. Errors Clustered by Country)**

| <i>Independent variables</i>         | DV: <i>Institutional Investor</i> rating, OLS |                       | DV: <i>Euromoney</i> rating, OLS |                       |
|--------------------------------------|-----------------------------------------------|-----------------------|----------------------------------|-----------------------|
|                                      | (1) 1-year lag                                | (2) 3-year lag        | (3) 1-year lag                   | (4) 3-year lag        |
| Article VIII <sub>t-1,3</sub>        | -4.520<br>(2.898)                             | -3.010<br>(3.144)     | -4.166<br>(2.735)                | -1.240<br>(3.233)     |
| Restriction <sub>t-1,3</sub>         | -1.442<br>(2.551)                             | -1.373<br>(2.534)     | -1.024<br>(2.521)                | -1.055<br>(2.583)     |
| Noncompliance <sub>t-1,3</sub>       | 9.392**<br>(3.079)                            | 9.722**<br>(3.438)    | 10.016**<br>(3.159)              | 9.427*<br>(3.874)     |
| Reserves/debt <sub>t-1</sub>         | -0.0002<br>(0.015)                            | 0.004<br>(0.015)      | 0.004<br>(0.014)                 | 0.011<br>(0.014)      |
| BOP/GDP <sub>t-1</sub>               | -0.064<br>(0.062)                             | -0.066<br>(0.058)     | -0.109<br>(0.074)                | -0.107<br>(0.072)     |
| Debt/GNI <sub>t-1</sub>              | 0.012<br>(0.010)                              | 0.012<br>(0.010)      | 0.018<br>(0.009)                 | 0.018<br>(0.010)      |
| GDP growth <sub>t-1</sub>            | -0.369*<br>(0.150)                            | -0.354*<br>(0.151)    | -0.573***<br>(0.158)             | -0.542**<br>(0.173)   |
| GDP per capita <sub>t-1</sub>        | -0.003***<br>(0.0007)                         | -0.004***<br>(0.0007) | -0.003***<br>(0.0009)            | -0.003***<br>(0.0009) |
| Inflation <sub>t-1</sub>             | 0.0007<br>(0.0005)                            | 0.0004<br>(0.0004)    | 0.001<br>(0.0006)                | 0.0006<br>(0.0006)    |
| Trade openness <sub>t-1</sub>        | 0.019<br>(0.037)                              | 0.016<br>(0.038)      | 0.028<br>(0.034)                 | 0.018<br>(0.036)      |
| Regime type <sub>t-1</sub>           | -0.103<br>(0.149)                             | -0.117<br>(0.152)     | -0.156<br>(0.179)                | -0.197<br>(0.188)     |
| Political instability <sub>t-1</sub> | 2.368<br>(1.394)                              | 2.371<br>(1.461)      | 3.374*<br>(1.442)                | 3.344*<br>(1.566)     |
| % Years in Default                   | 0.257***<br>(0.064)                           | 0.263***<br>(0.062)   | 0.159*<br>(0.063)                | 0.153*<br>(0.066)     |
| Openness <sub>t-1</sub>              | -5.620**<br>(1.743)                           | -6.109***<br>(1.776)  | -7.733***<br>(1.847)             | -8.487***<br>(1.979)  |
| IMF program <sub>t-1</sub>           | 5.666***<br>(1.172)                           | 6.014***<br>(1.189)   | 4.935***<br>(1.304)              | 5.207***<br>(1.348)   |
| Currency Crisis <sub>t-1</sub>       | 1.722*<br>(0.816)                             | 1.911*<br>(0.786)     | 1.832<br>(1.075)                 | 2.027<br>(1.044)      |
| Shift Left                           | 1.744<br>(1.882)                              | 1.273<br>(1.996)      | 1.402<br>(2.583)                 | 0.792<br>(2.815)      |
| Constant                             | 70.173***<br>(3.981)                          | 70.169***<br>(3.924)  | 59.583***<br>(4.255)             | 59.921***<br>(4.304)  |
| No. of observations                  | 1,102                                         | 1,073                 | 1,032                            | 999                   |
| R <sup>2</sup>                       | 0.51                                          | 0.53                  | 0.43                             | 0.42                  |

Note: Robust standard errors corrected for clustering by country in parentheses below OLS coefficients;  
\*significant at 10%; \*\*significant at 5%; \*\*\*significant at 1% level and below.

**Table 2: Fixed Effects Vector Decomposition Models of Sovereign Risk Ratings<sup>1</sup>**

| <i>Independent variables</i>         | DV: <i>Institutional Investor</i> rating; XTFEVD |                       | DV: <i>Euromoney</i> rating; XTFEVD |                      |
|--------------------------------------|--------------------------------------------------|-----------------------|-------------------------------------|----------------------|
|                                      | (1) 1-year lag                                   | (2) 3-year lag        | (3) 1-year lag                      | (4) 3-year lag       |
| Article VIII <sub>t-1,3</sub>        | -0.975***<br>(0.271)                             | 0.045<br>(0.274)      | 3.897***<br>(0.777)                 | 7.182***<br>(0.786)  |
| Restriction <sub>t-1,3</sub>         | -1.153***<br>(0.225)                             | -0.170<br>(0.220)     | -1.674*<br>(0.635)                  | -2.630***<br>(0.620) |
| Noncompliance <sub>t-1,3</sub>       | 3.219***<br>(0.335)                              | 1.344***<br>(0.355)   | 7.872***<br>(0.942)                 | 6.831***<br>(0.995)  |
| Reserves/debt <sub>t-1</sub>         | -0.020***<br>(0.003)                             | -0.041***<br>(0.003)  | -0.014<br>(0.008)                   | -0.021*<br>(0.009)   |
| BOP/GDP <sub>t-1</sub>               | -0.021<br>(0.014)                                | -0.023<br>(0.014)     | 0.013<br>(0.038)                    | 0.015<br>(0.039)     |
| Debt/GNI <sub>t-1</sub>              | 0.006***<br>(0.001)                              | 0.007***<br>(0.001)   | 0.012**<br>(0.004)                  | 0.017***<br>(0.004)  |
| GDP growth <sub>t-1</sub>            | -0.016<br>(0.016)                                | -0.009<br>(0.017)     | -0.078<br>(0.043)                   | -0.059<br>(0.046)    |
| GDP per capita <sub>t-1</sub>        | -0.006***<br>(0.0003)                            | -0.005***<br>(0.0004) | -0.009***<br>(0.001)                | -0.010***<br>(0.001) |
| Inflation <sub>t-1</sub>             | 0.0002<br>(0.0001)                               | 0.0002<br>(0.0001)    | -0.0001<br>(0.0004)                 | -0.0002<br>(0.0004)  |
| Trade openness <sub>t-1</sub>        | -0.017*<br>(0.007)                               | -0.027***<br>(0.007)  | 0.001<br>(0.017)                    | -0.011<br>(0.017)    |
| Regime type <sub>t-1</sub>           | -0.044*<br>(0.021)                               | -0.057*<br>(0.022)    | -0.282***<br>(0.059)                | -0.265***<br>(0.060) |
| Political instability <sub>t-1</sub> | -0.600**<br>(0.196)                              | -0.510*<br>(0.201)    | 1.573**<br>(0.554)                  | 1.411*<br>(0.566)    |
| % Years in Default                   | 0.324***<br>(0.005)                              | 0.315***<br>(0.005)   | 0.284***<br>(0.013)                 | 0.265***<br>(0.015)  |
| Openness <sub>t-1</sub>              | -2.712***<br>(0.171)                             | -1.827***<br>(0.174)  | -5.791***<br>(0.463)                | -5.704***<br>(0.467) |
| IMF program <sub>t-1</sub>           | 0.582**<br>(0.191)                               | 0.409*<br>(0.197)     | 1.988***<br>(0.508)                 | 1.935***<br>(0.520)  |
| Currency Crisis <sub>t-1</sub>       | 2.258***<br>(0.293)                              | 1.527***<br>(0.301)   | 2.382**<br>(0.776)                  | 2.098*<br>(0.794)    |
| Shift Left                           | -0.797*<br>(0.329)                               | -0.325<br>(0.335)     | 0.413<br>(0.940)                    | -0.106<br>(0.956)    |
| Constant                             | 77.953***<br>(0.214)                             | 76.875***<br>(0.211)  | 69.602***<br>(0.606)                | 71.095***<br>(0.603) |
| No. of observations                  | 1,018                                            | 990                   | 930                                 | 899                  |
| Adjusted R <sup>2</sup>              | 0.56                                             | 0.50                  | 0.78                                | 0.77                 |

Note: Fixed effects vector decomposition regression with correction for AR(1) serial correlation; \*significant at 10%; \*\*significant at 5%; \*\*\*significant at 1% level and below.

<sup>1</sup> In the fixed effect vector decomposition regressions, *Article VIII*, *Restriction*, *Noncompliance*, *% Years in Default*, *Openness*, *Instability*, *Currency Crisis*, and *Shift Left* are treated as the slow-moving variables.

**Table 3: Selection Models of Risk Ratings (3-Year Lags for Article VIII Covariates)**

| <i>Independent variables</i>  | DV: Article VIII       | DV: <i>IIR</i>        | DV: Article VIII       | DV: <i>Euromoney</i> rating |
|-------------------------------|------------------------|-----------------------|------------------------|-----------------------------|
|                               | (1) Probit, sel. stage | (2) 2nd-stage OLS     | (3) Probit, sel. stage | (4) 2nd-stage OLS           |
| Regional norm                 | 0.048***<br>(0.006)    |                       | 0.044***<br>(0.006)    |                             |
| Universality                  | 0.010<br>(0.008)       |                       | 0.017*<br>(0.008)      |                             |
| Article VIII <sub>t-3</sub>   |                        | -4.083<br>(2.892)     |                        | -1.333<br>(3.247)           |
| Restriction <sub>t-3</sub>    |                        | -2.280<br>(3.254)     |                        | -4.634<br>(3.086)           |
| Noncompliance <sub>t-3</sub>  |                        | 8.611*<br>(3.744)     |                        | 11.873**<br>(3.865)         |
| Reserves/debt <sub>t-1</sub>  | -0.0006<br>(0.001)     | 0.001<br>(0.010)      | -0.001<br>(0.001)      | 0.008<br>(0.013)            |
| BOP/GDP <sub>t-1</sub>        | -0.009<br>(0.010)      | -0.110<br>(0.118)     | -0.002<br>(0.011)      | -0.169<br>(0.120)           |
| Debt/GNI <sub>t-1</sub>       | 0.0008<br>(0.001)      | -0.0004<br>(0.005)    | 0.001<br>(0.001)       | 0.014<br>(0.009)            |
| GDP growth <sub>t-1</sub>     | -0.003<br>(0.011)      | -0.590***<br>(0.161)  | -0.004<br>(0.012)      | -0.722***<br>(0.184)        |
| GDP per capita <sub>t-1</sub> | 0.0001<br>(0.0001)     | -0.004***<br>(0.0007) | 0.00009<br>(0.0001)    | -0.003***<br>(0.0008)       |
| Inflation <sub>t-1</sub>      | -0.00008<br>(0.00007)  | 0.0002<br>(0.0004)    | -0.0001<br>(0.0001)    | -0.00001<br>(0.0009)        |
| Trade openness <sub>t-1</sub> | 0.016**<br>(0.005)     | -0.028<br>(0.040)     | 0.014**<br>(0.005)     | -0.025<br>(0.036)           |
| Regime type <sub>t-1</sub>    | 0.020<br>(0.023)       | -0.045<br>(0.156)     | 0.026<br>(0.022)       | -0.066<br>(0.183)           |

|                                      |                        |                       |                        |                       |
|--------------------------------------|------------------------|-----------------------|------------------------|-----------------------|
| Political instability <sub>t-1</sub> | 0.019<br>(0.229)       | 1.357<br>(2.267)      | -0.129<br>(0.229)      | 1.974<br>(2.619)      |
| % Years in Default                   | 0.003<br>(0.011)       | 0.386***<br>(0.076)   | 0.004<br>(0.011)       | 0.242***<br>(0.074)   |
| Openness <sub>t-1</sub>              | -0.012<br>(0.255)      | -10.343***<br>(1.589) | 0.078<br>(0.241)       | -12.672***<br>(1.843) |
| IMF program <sub>t-1</sub>           | 0.097<br>(0.211)       | 6.724***<br>(1.821)   | 0.074<br>(0.224)       | 7.330***<br>(2.108)   |
| Currency Crisis <sub>t-1</sub>       | -0.529***<br>(0.133)   | 1.209<br>(1.295)      | -0.485***<br>(0.143)   | 0.729<br>(1.782)      |
| Shift Left                           |                        | 0.413<br>(1.647)      |                        | -0.083<br>(2.556)     |
| Constant                             | -4.603***<br>(0.568)   | 76.080***<br>(4.654)  | -4.670***<br>(0.528)   | 62.079***<br>(5.080)  |
| $\lambda$                            |                        | -0.695<br>(1.874)     |                        | 2.489<br>(1.942)      |
| Observations                         | 1,252 (430 uncensored) |                       | 1,234 (412 uncensored) |                       |

Note: OLS coefficients in columns (2) and (4) from two-stage Heckman selection model (robust standard errors in parentheses). Columns (1) and (3) display probit estimates from first stage; \*significant at 10%; \*\*significant at 5%; \*\*\*significant at 1% level and below.

**Table 4: Art. VIII Compliance and Sovereign Risk (Split Samples, 3-Year Lags)**

| <i>Independent variables</i>         | DV: <i>Institutional Investor</i> rating |                                   | DV: <i>Euromoney</i> rating |                       |
|--------------------------------------|------------------------------------------|-----------------------------------|-----------------------------|-----------------------|
|                                      | (1) IMF program                          | (2) Crisis                        | (3) IMF program             | (4) Crisis            |
|                                      | cases omitted                            | cases omitted                     | cases omitted               | cases omitted         |
| Article VIII <sub>t-3</sub>          | -0.637<br>(1.290)                        | -2.794*<br>(1.387)                | -2.411<br>(1.738)           | -2.256<br>(1.524)     |
| Restriction <sub>t-3</sub>           | -0.319<br>(1.054)                        | -1.247*<br>(0.518)                | -1.529<br>(1.449)           | -1.978*<br>(0.951)    |
| Noncompliance <sub>t-3</sub>         | 2.836<br>(2.265)                         | 3.524***<br>(1.040)               | 7.731**<br>(2.710)          | 6.449**<br>(2.155)    |
| Reserves/debt <sub>t-1</sub>         | -0.005<br>(0.007)                        | -0.023***<br>(0.007)              | 0.017<br>(0.012)            | 0.008<br>(0.012)      |
| BOP/GDP <sub>t-1</sub>               | -0.041<br>(0.041)                        | -0.026<br>(0.019)                 | -0.040<br>(0.072)           | -0.068<br>(0.048)     |
| Debt/GNI <sub>t-1</sub>              | -0.003<br>(0.005)                        | 0.018***<br>(0.004)               | 0.006<br>(0.006)            | 0.021***<br>(0.005)   |
| GDP growth <sub>t-1</sub>            | -0.015<br>(0.034)                        | -0.017<br>(0.020)                 | -0.167*<br>(0.083)          | -0.103<br>(0.055)     |
| GDP per capita <sub>t-1</sub>        | -0.006***<br>(0.0007)                    | -0.004***<br>(0.0003)             | -0.003***<br>(0.0008)       | -0.003***<br>(0.0005) |
| Inflation <sub>t-1</sub>             | -0.00008<br>(0.0003)                     | 9.24x10 <sup>-6</sup><br>(0.0001) | -0.001<br>(0.001)           | -0.0002<br>(0.0004)   |
| Trade openness <sub>t-1</sub>        | 0.106***<br>(0.014)                      | 0.012<br>(0.013)                  | 0.068*<br>(0.025)           | -0.0004<br>(0.015)    |
| Regime type <sub>t-1</sub>           | 0.019<br>(0.110)                         | 0.009<br>(0.066)                  | -0.286*<br>(0.107)          | -0.209***<br>(0.065)  |
| Political instability <sub>t-1</sub> | 0.408<br>(1.021)                         | 0.172<br>(0.374)                  | 4.829**<br>(1.579)          | 2.016*<br>(0.819)     |
| % Years in Default                   | 0.503***<br>(0.066)                      | 0.259***<br>(0.049)               | 0.303***<br>(0.079)         | 0.152***<br>(0.042)   |
| Openness <sub>t-1</sub>              | -6.711***<br>(0.965)                     | -3.676***<br>(0.842)              | -11.133***<br>(1.731)       | -6.222***<br>(1.211)  |
| Currency Crisis <sub>t-1</sub>       | 1.723<br>(1.059)                         |                                   | -0.689<br>(1.633)           |                       |
| Shift Left                           | 2.727<br>(1.818)                         | 0.848<br>(0.696)                  | 3.254<br>(2.127)            | -0.893<br>(0.900)     |
| Constant                             | 67.839***<br>(1.835)                     | 76.028***<br>(1.774)              | 59.537***<br>(3.811)        | 66.697***<br>(2.065)  |
| Number of countries                  | 63                                       | 79                                | 72                          | 94                    |
| Number of obs.                       | 452                                      | 999                               | 406                         | 928                   |
| R <sup>2</sup>                       | 0.97                                     | 0.96                              | 0.93                        | 0.91                  |
| Wald $\chi^2$                        | 2593.80                                  | 474.40                            | 827.41                      | 245.29                |
| Probability > $\chi^2$               | 0.0000                                   | 0.0000                            | 0.0000                      | 0.0000                |

Note: Panel corrected standard errors in parentheses below Prais-Winsten coefficients;  
\*significant at 10%; \*\*significant at 5%; \*\*\*significant at 1% level and below.

**Table 5: Art. VIII Compliance and Sovereign Risk, 1979-1991 (3-Year Lags)**

| <i>Independent variables</i> | DV: <i>Institutional Investor rating</i> | DV: <i>Euro money rating</i> |
|------------------------------|------------------------------------------|------------------------------|
| Article VIII $t-3$           | -1.729<br>(2.150)                        | 2.197<br>(2.227)             |
| Restriction $t-3$            | -1.603*<br>(0.566)                       | -1.271<br>(1.263)            |
| Noncompliance $t-3$          | 3.870*<br>(1.874)                        | 4.770<br>(2.843)             |
| Reserves/debt $t-1$          | -0.041***<br>(0.011)                     | -0.005<br>(0.022)            |
| BOP/GDP $t-1$                | -0.041<br>(0.026)                        | -0.073<br>(0.082)            |
| Debt/GNI $t-1$               | 0.003<br>(0.004)                         | 0.003<br>(0.006)             |
| GDP growth $t-1$             | -0.046<br>(0.028)                        | -0.139<br>(0.084)            |
| GDP per capita $t-1$         | -0.005***<br>(0.0004)                    | -0.003***<br>(0.0006)        |
| Inflation $t-1$              | 0.0001<br>(0.0002)                       | -0.0002<br>(0.0005)          |
| Trade openness $t-1$         | 0.030<br>(0.017)                         | 0.032<br>(0.020)             |
| Regime type $t-1$            | -0.077<br>(0.053)                        | -0.239*<br>(0.107)           |
| Political instability $t-1$  | -0.543<br>(0.545)                        | 1.631<br>(1.427)             |
| % Years in Default           | 0.484***<br>(0.062)                      | 0.243**<br>(0.077)           |
| Openness $t-1$               | -2.411***<br>(0.729)                     | -4.266*<br>(1.602)           |
| IMF program $t-1$            | 1.341*<br>(0.501)                        | 1.764<br>(1.030)             |
| Currency Crisis $t-1$        | 1.131*<br>(0.491)                        | 1.084<br>(1.064)             |
| Shift Left                   | 2.991***<br>(0.936)                      | -0.841<br>(2.396)            |
| Constant                     | 72.039***<br>(1.633)                     | 62.395***<br>(3.153)         |
| Number of countries          | 64                                       | 68                           |
| Number of observations       | 700                                      | 570                          |
| R <sup>2</sup>               | 0.95                                     | 0.84                         |
| Wald $\chi^2$                | 391.83                                   | 123.88                       |
| Probability > $\chi^2$       | 0.0000                                   | 0.0000                       |

Note: Panel corrected standard errors in parentheses below Prais-Winsten coefficients; \*significant at 10%; \*\*significant at 5%; \*\*\*significant at 1% level and below.
